# Supplementary material
Source: MDPI journal article supplement (https://www.mdpi.com/2571-6131/4/3/30)
Supplement: s1 [file s1]

| v7               |                        |                           |                   | density<br>Ø average | density<br>± STD DEV | rel.<br>Density<br>Ø average | rel.<br>Density<br>± STD DEV | E-Modul<br>Ø average | E-Modul<br>± STD DEV | HV<br>Ø average | HV<br>± STD DEV | K1C,PQ<br>Niihara<br>Ø average | K1C,PQ<br>Niihara<br>± STD DEV | Toughness<br>K <sub>c</sub> ,ISB<br>Ø average | Toughness<br>K <sub>c</sub> ,ISB<br>± STD DEV | Bending<br>strength<br>Ø average | Bending<br>strength<br>± STD DEV | conductivity<br>Ø average | conductivity<br>± STD DEV | monoklinic<br>content<br>Vm,pol<br>Ø average | monoklinic<br>content<br>Vm,pol<br>± STD DEV | monoklinic<br>content<br>Vm,fract<br>Ø average | monoklinic<br>content<br>Vm,fract<br>± STD DEV | transform<br>ability<br>Ø average | transform<br>ability<br>± STD DEV |
|------------------|------------------------|---------------------------|-------------------|----------------------|----------------------|------------------------------|------------------------------|----------------------|----------------------|-----------------|-----------------|--------------------------------|--------------------------------|-----------------------------------------------|-----------------------------------------------|----------------------------------|----------------------------------|---------------------------|---------------------------|----------------------------------------------|----------------------------------------------|------------------------------------------------|------------------------------------------------|-----------------------------------|-----------------------------------|
|                  |                        |                           |                   | g/cm <sup>3</sup>    | g/cm <sup>3</sup>    | %                            | %                            | GPa                  | GPa                  | -               | -               | MPa m1/2                       | MPa m1/2                       | MPa m1/2                                      | MPa m1/2                                      | MPa                              | MPa                              | S/m                       | S/m                       | vol.-%                                       | vol.-%                                       | vol.-%                                         | vol.-%                                         | vol.-%                            | vol.-%                            |
| Sample name      | Sintert<br>emp<br>[°C] | Sinter<br>Duration<br>[h] | Pressure<br>[MPa] | density              | density              | rel.<br>Density              | rel.<br>Density              | E-Modul              | E-Modul              | HV              | HV              | K1C,PQ<br>Niihara              | K1C,PQ<br>Niihara              | Toughness<br>K <sub>c</sub> ,ISB              | Toughness<br>K <sub>c</sub> ,ISB              | Bending<br>strength              | Bending<br>strength              | conductivity              | conductivity              | monoklinic<br>content<br>Vm,pol              | monoklinic<br>content<br>Vm,pol              | monoklinic<br>content<br>Vm,fract              | monoklinic<br>content<br>Vm,fract              | transform<br>ability              | transform<br>ability              |
| 0A-24DN4.0 1300C | 1300                   | 2                         | 60                | 8,40                 | 0,01                 | 98,52                        | 0,13                         | 269                  | 1                    | 1533            | 22              | 6,47                           | 0,43                           | 6,58                                          | 0                                             | 1136                             | 230                              | 6410,76                   | 242,70                    | 2,50                                         | 0,26                                         | 44,57                                          | 1,89                                           | 42,08                             | 2,14                              |
| 0A-24DN4.0 1350C | 1350                   | 2                         | 60                | 8,46                 | 0,00                 | 99,22                        | 0,06                         | 275                  | 1                    | 1552            | 21              | 6,34                           | 0,04                           | 6,35                                          | 0                                             | 1462                             | 232                              | 6723,03                   | 35,99                     |                                              |                                              |                                                |                                                |                                   |                                   |
| 0A-24DN4.0 1400C | 1400                   | 2                         | 60                | 8,47                 | 0,00                 | 99,26                        | 0,04                         | 273                  | 2                    | 1548            | 17              | 6,25                           | 0,03                           | 6,37                                          | 0                                             | 1657                             | 223                              | 6752,39                   | 58,54                     | 1,76                                         | 0,15                                         | 45,90                                          | 1,83                                           | 44,14                             | 1,98                              |
| 0A-28DN4.0 1300C | 1300                   | 2                         | 60                | 8,87                 | 0,01                 | 99,50                        | 0,06                         | 285                  | 2                    | 1610            | 14              | 6,33                           | 0,08                           | 6,44                                          | 0                                             | 1147                             | 138                              | 31275,81                  | 408,42                    | 2,43                                         | 0,24                                         | 43,02                                          | 2,08                                           | 40,59                             | 2,32                              |
| 0A-28DN4.0 1350C | 1350                   | 2                         | 60                | 8,86                 | 0,04                 | 99,44                        | 0,45                         | 289                  | 3                    | 1611            | 8               | 6,33                           | 0,08                           | 6,51                                          | 0                                             | 1384                             | 293                              | 33306,94                  | 242,43                    |                                              |                                              |                                                |                                                |                                   |                                   |
| 0A-28DN4.0 1400C | 1400                   | 2                         | 60                | 8,89                 | 0,01                 | 99,77                        | 0,09                         | 287                  | 0                    | 1620            | 17              | 6,20                           | 0,03                           | 6,36                                          | 0                                             | 1568                             | 247                              | 33195,43                  | 320,54                    | 1,72                                         | 0,19                                         | 48,19                                          | 2,18                                           | 46,47                             | 2,37                              |
| 0A-32DN4.0 1300C | 1300                   | 2                         | 60                | 9,28                 | 0,01                 | 99,80                        | 0,12                         | 299                  | 1                    | 1667            | 17              | 6,39                           | 0,05                           | 6,54                                          | 0                                             | 1026                             | 46                               | 68969,85                  | 1717,39                   | 2,03                                         | 0,18                                         | 43,16                                          | 2,51                                           | 41,13                             | 2,59                              |
| 0A-32DN4.0 1350C | 1350                   | 2                         | 60                | 9,24                 | 0,05                 | 99,36                        | 0,50                         | 301                  | 4                    | 1677            | 9               | 6,35                           | 0,07                           | 6,41                                          | 0                                             | 1303                             | 267                              | 76905,47                  | 1294,59                   |                                              |                                              |                                                |                                                |                                   |                                   |
| 0A-32DN4.0 1400C | 1400                   | 2                         | 60                | 9,19                 | 0,05                 | 98,91                        | 0,53                         | 305                  | 1                    | 1696            | 18              | 6,35                           | 0,04                           | 6,39                                          | 0                                             | 1713                             | 235                              | 77461,36                  | 520,56                    | 1,96                                         | 0,26                                         | 52,14                                          | 2,92                                           | 50,18                             | 3,19                              |
